# Supplementary material for: Assessment of the Functioning Profile of Patients with Lung Cancer Undergoing Lobectomy in Relation to the ICF Rehabilitation Core Set
Source: MDPI journal article supplement (doi:10.3390/jcm12226995), 2023-11-09
Supplement: s1 [file s1]

## Supplementary Materials S1

### Analysis of the distribution of the results of the ICF questionnaire

**Table S1.** Distribution of ICF questionnaire variables by sex at the time points 1 day after surgery (t1) and on the day of discharge (t2).

| <i>Characteristic</i>                         | <i>N</i> | <i>Sex</i>                        |                                 | <i>p</i> <sup>2</sup> |
|-----------------------------------------------|----------|-----------------------------------|---------------------------------|-----------------------|
|                                               |          | <i>female, n = 23<sup>1</sup></i> | <i>male, n = 27<sup>1</sup></i> |                       |
| <b>Energy and drive functions (b130) (t1)</b> | 50       |                                   |                                 | <b>0.020</b>          |
| No impairment                                 |          | 1.00 (4.35%)                      | 9.00 (33.33%)                   | <b>0.014</b>          |
| Mild impairment                               |          | 17.00 (73.91%)                    | 16.00 (59.26%)                  | 0.276 <sup>4</sup>    |
| Moderate impairment                           |          | 5.00 (21.74%)                     | 2.00 (7.41%)                    | 0.225                 |
| <b>Energy and drive functions (b130) (t2)</b> | 50       |                                   |                                 | <b>0.025</b>          |
| No impairment                                 |          | 1.00 (4.35%)                      | 9.00 (33.33%)                   | <b>0.014</b>          |
| Mild impairment                               |          | 18.00 (78.26%)                    | 16.00 (59.26%)                  | 0.151 <sup>4</sup>    |
| Moderate impairment                           |          | 4.00 (17.39%)                     | 2.00 (7.41%)                    | 0.395                 |
| <b>Sleep functions (b134) (t1)</b>            | 50       |                                   |                                 | 0.668                 |
| No impairment                                 |          | 1.00 (4.35%)                      | 3.00 (11.11%)                   |                       |
| Mild impairment                               |          | 20.00 (86.96%)                    | 20.00 (74.07%)                  |                       |
| Moderate impairment                           |          | 2.00 (8.70%)                      | 4.00 (14.81%)                   |                       |
| <b>Sleep functions (b134) (t2)</b>            | 50       |                                   |                                 | 0.623                 |
| No impairment                                 |          | 1.00 (4.35%)                      | 3.00 (11.11%)                   |                       |
| Mild impairment                               |          | 21.00 (91.30%)                    | 21.00 (77.78%)                  |                       |
| Moderate impairment                           |          | 1.00 (4.35%)                      | 3.00 (11.11%)                   |                       |
| <b>Emotional functions (b152) (t1)</b>        | 50       |                                   |                                 | 0.590                 |
| No impairment                                 |          | 1.00 (4.35%)                      | 3.00 (11.11%)                   |                       |
| Mild impairment                               |          | 12.00 (52.17%)                    | 13.00 (48.15%)                  |                       |

| <i>Characteristic</i>                           | <i>N</i> | <i>Sex</i>                        |                                 | <i>p</i> <sup>2</sup> |
|-------------------------------------------------|----------|-----------------------------------|---------------------------------|-----------------------|
|                                                 |          | <i>female, n = 23<sup>1</sup></i> | <i>male, n = 27<sup>1</sup></i> |                       |
| Moderate impairment                             |          | 7.00 (30.43%)                     | 10.00 (37.04%)                  |                       |
| Severe impairment                               |          | 3.00 (13.04%)                     | 1.00 (3.70%)                    |                       |
| <b>Emotional functions (b152) (t2)</b>          | 50       |                                   |                                 | 0.372                 |
| No impairment                                   |          | 1.00 (4.35%)                      | 3.00 (11.11%)                   |                       |
| Mild impairment                                 |          | 13.00 (56.52%)                    | 13.00 (48.15%)                  |                       |
| Moderate impairment                             |          | 7.00 (30.43%)                     | 11.00 (40.74%)                  |                       |
| Severe impairment                               |          | 2.00 (8.70%)                      | 0.00 (0.00%)                    |                       |
| <b>Sensation of pain (b280) (t1)</b>            | 50       |                                   |                                 | 1.000                 |
| Mild impairment                                 |          | 0.00 (0.00%)                      | 1.00 (3.70%)                    |                       |
| Moderate impairment                             |          | 20.00 (86.96%)                    | 23.00 (85.19%)                  |                       |
| Severe impairment                               |          | 2.00 (8.70%)                      | 2.00 (7.41%)                    |                       |
| Complete impairment                             |          | 1.00 (4.35%)                      | 1.00 (3.70%)                    |                       |
| <b>Sensation of pain (b280) (t2)</b>            | 50       |                                   |                                 | 0.711                 |
| No impairment                                   |          | 1.00 (4.35%)                      | 1.00 (3.70%)                    |                       |
| Mild impairment                                 |          | 20.00 (86.96%)                    | 21.00 (77.78%)                  |                       |
| Moderate impairment                             |          | 2.00 (8.70%)                      | 5.00 (18.52%)                   |                       |
| <b>Exercise-tolerance functions (b455) (t1)</b> | 50       |                                   |                                 | 0.979                 |
| Mild impairment                                 |          | 4.00 (17.39%)                     | 6.00 (22.22%)                   |                       |
| Moderate impairment                             |          | 8.00 (34.78%)                     | 9.00 (33.33%)                   |                       |
| Severe impairment                               |          | 7.00 (30.43%)                     | 7.00 (25.93%)                   |                       |
| Complete impairment                             |          | 4.00 (17.39%)                     | 5.00 (18.52%)                   |                       |
| <b>Exercise-tolerance functions (b455) (t2)</b> | 50       |                                   |                                 | 0.975 <sup>3</sup>    |

| <i>Characteristic</i>                          | <i>N</i> | <i>Sex</i>                        |                                 | <i>p</i> <sup>2</sup> |
|------------------------------------------------|----------|-----------------------------------|---------------------------------|-----------------------|
|                                                |          | <i>female, n = 23<sup>l</sup></i> | <i>male, n = 27<sup>l</sup></i> |                       |
| No impairment                                  |          | 9.00 (39.13%)                     | 10.00 (37.04%)                  |                       |
| Mild impairment                                |          | 7.00 (30.43%)                     | 8.00 (29.63%)                   |                       |
| Moderate impairment                            |          | 7.00 (30.43%)                     | 9.00 (33.33%)                   |                       |
| <b>Urination functions (b620) (t1)</b>         | 50       |                                   |                                 | 0.520 <sup>3</sup>    |
| No impairment                                  |          | 17.00 (73.91%)                    | 22.00 (81.48%)                  |                       |
| Mild impairment                                |          | 6.00 (26.09%)                     | 5.00 (18.52%)                   |                       |
| <b>Urination functions (b620) (t2)</b>         | 50       |                                   |                                 | 0.480                 |
| No impairment                                  |          | 17.00 (73.91%)                    | 23.00 (85.19%)                  |                       |
| Mild impairment                                |          | 6.00 (26.09%)                     | 4.00 (14.81%)                   |                       |
| <b>Sexual functions (b640) (t1)</b>            | 50       |                                   |                                 | 0.811 <sup>3</sup>    |
| No impairment                                  |          | 11.00 (47.83%)                    | 12.00 (44.44%)                  |                       |
| Mild impairment                                |          | 12.00 (52.17%)                    | 15.00 (55.56%)                  |                       |
| <b>Sexual functions (b640) (t2)</b>            | 50       |                                   |                                 | 0.811 <sup>3</sup>    |
| No impairment                                  |          | 11.00 (47.83%)                    | 12.00 (44.44%)                  |                       |
| Mild impairment                                |          | 12.00 (52.17%)                    | 15.00 (55.56%)                  |                       |
| <b>Mobility-of-joint functions (b710) (t1)</b> | 50       |                                   |                                 | 0.573                 |
| No impairment                                  |          | 2.00 (8.70%)                      | 1.00 (3.70%)                    |                       |
| Mild impairment                                |          | 12.00 (52.17%)                    | 15.00 (55.56%)                  |                       |
| Moderate impairment                            |          | 4.00 (17.39%)                     | 8.00 (29.63%)                   |                       |
| Severe impairment                              |          | 5.00 (21.74%)                     | 3.00 (11.11%)                   |                       |
| <b>Mobility-of-joint functions (b710) (t2)</b> | 50       |                                   |                                 | 0.218                 |
| No impairment                                  |          | 14.00 (60.87%)                    | 20.00 (74.07%)                  |                       |

| <i>Characteristic</i>                                      | <i>N</i> | <i>Sex</i>                        |                                 | <i>p</i> <sup>2</sup> |
|------------------------------------------------------------|----------|-----------------------------------|---------------------------------|-----------------------|
|                                                            |          | <i>female, n = 23<sup>l</sup></i> | <i>male, n = 27<sup>l</sup></i> |                       |
| Mild impairment                                            |          | 6.00 (26.09%)                     | 7.00 (25.93%)                   |                       |
| Moderate impairment                                        |          | 3.00 (13.04%)                     | 0.00 (0.00%)                    |                       |
| <b>Muscle-power functions (b730) (t1)</b>                  | 50       |                                   |                                 | 0.443                 |
| No impairment                                              |          | 12.00 (52.17%)                    | 10.00 (37.04%)                  |                       |
| Mild impairment                                            |          | 8.00 (34.78%)                     | 14.00 (51.85%)                  |                       |
| Moderate impairment                                        |          | 3.00 (13.04%)                     | 2.00 (7.41%)                    |                       |
| Severe impairment                                          |          | 0.00 (0.00%)                      | 1.00 (3.70%)                    |                       |
| <b>Muscle-power functions (b730) (t2)</b>                  | 50       |                                   |                                 | 0.588                 |
| No impairment                                              |          | 21.00 (91.30%)                    | 26.00 (96.30%)                  |                       |
| Mild impairment                                            |          | 2.00 (8.70%)                      | 1.00 (3.70%)                    |                       |
| <b>Carrying-out daily routine (d230), performance (t1)</b> | 50       |                                   |                                 | 0.109                 |
| No difficulty                                              |          | 2.00 (8.70%)                      | 8.00 (29.63%)                   |                       |
| Mild difficulty                                            |          | 20.00 (86.96%)                    | 16.00 (59.26%)                  |                       |
| Moderate difficulty                                        |          | 1.00 (4.35%)                      | 3.00 (11.11%)                   |                       |
| <b>Carrying-out daily routine (d230), capacity (t1)</b>    | 50       |                                   |                                 | 0.109                 |
| No difficulty                                              |          | 2.00 (8.70%)                      | 8.00 (29.63%)                   |                       |
| Mild difficulty                                            |          | 20.00 (86.96%)                    | 16.00 (59.26%)                  |                       |
| Moderate difficulty                                        |          | 1.00 (4.35%)                      | 3.00 (11.11%)                   |                       |
| <b>Carrying-out daily routine (d230), performance (t2)</b> | 50       |                                   |                                 | 0.209                 |
| No difficulty                                              |          | 2.00 (8.70%)                      | 7.00 (25.93%)                   |                       |
| Mild difficulty                                            |          | 20.00 (86.96%)                    | 17.00 (62.96%)                  |                       |
| Moderate difficulty                                        |          | 1.00 (4.35%)                      | 3.00 (11.11%)                   |                       |

| <i>Characteristic</i>                                                           | <i>N</i> | <i>Sex</i>                        |                                 | <i>p</i> <sup>2</sup> |
|---------------------------------------------------------------------------------|----------|-----------------------------------|---------------------------------|-----------------------|
|                                                                                 |          | <i>female, n = 23<sup>l</sup></i> | <i>male, n = 27<sup>l</sup></i> |                       |
| <b>Carrying-out daily routine (d230), capacity (t2)</b>                         | 50       |                                   |                                 | 0.209                 |
| No difficulty                                                                   |          | 2.00 (8.70%)                      | 7.00 (25.93%)                   |                       |
| Mild difficulty                                                                 |          | 20.00 (86.96%)                    | 17.00 (62.96%)                  |                       |
| Moderate difficulty                                                             |          | 1.00 (4.35%)                      | 3.00 (11.11%)                   |                       |
| <b>Handling stress and other psychological demands (d240), performance (t1)</b> | 50       |                                   |                                 | 0.590                 |
| Mild difficulty                                                                 |          | 12.00 (52.17%)                    | 13.00 (48.15%)                  |                       |
| Moderate difficulty                                                             |          | 7.00 (30.43%)                     | 10.00 (37.04%)                  |                       |
| No difficulty                                                                   |          | 1.00 (4.35%)                      | 3.00 (11.11%)                   |                       |
| Severe difficulty                                                               |          | 3.00 (13.04%)                     | 1.00 (3.70%)                    |                       |
| <b>Handling stress and other psychological demands (d240), capacity (t1)</b>    | 50       |                                   |                                 | 0.590                 |
| No difficulty                                                                   |          | 1.00 (4.35%)                      | 3.00 (11.11%)                   |                       |
| Mild difficulty                                                                 |          | 12.00 (52.17%)                    | 13.00 (48.15%)                  |                       |
| Moderate difficulty                                                             |          | 7.00 (30.43%)                     | 10.00 (37.04%)                  |                       |
| Severe difficulty                                                               |          | 3.00 (13.04%)                     | 1.00 (3.70%)                    |                       |
| <b>Handling stress and other psychological demands (d240), performance (t2)</b> | 50       |                                   |                                 | 0.440                 |
| No difficulty                                                                   |          | 1.00 (4.35%)                      | 3.00 (11.11%)                   |                       |
| Mild difficulty                                                                 |          | 13.00 (56.52%)                    | 14.00 (51.85%)                  |                       |
| Moderate difficulty                                                             |          | 7.00 (30.43%)                     | 10.00 (37.04%)                  |                       |
| Severe difficulty                                                               |          | 2.00 (8.70%)                      | 0.00 (0.00%)                    |                       |
| <b>Handling stress and other psychological demands (d240), capacity (t2)</b>    | 50       |                                   |                                 | 0.440                 |

| <i>Characteristic</i>                                        | <i>N</i> | <i>Sex</i>                        |                                 | <i>p</i> <sup>2</sup> |
|--------------------------------------------------------------|----------|-----------------------------------|---------------------------------|-----------------------|
|                                                              |          | <i>female, n = 23<sup>l</sup></i> | <i>male, n = 27<sup>l</sup></i> |                       |
| No difficulty                                                |          | 1.00 (4.35%)                      | 3.00 (11.11%)                   |                       |
| Mild difficulty                                              |          | 13.00 (56.52%)                    | 14.00 (51.85%)                  |                       |
| Moderate difficulty                                          |          | 7.00 (30.43%)                     | 10.00 (37.04%)                  |                       |
| Severe difficulty                                            |          | 2.00 (8.70%)                      | 0.00 (0.00%)                    |                       |
| <b>Changing basic body position (d410), performance (t1)</b> | 50       |                                   |                                 | 0.322                 |
| No difficulty                                                |          | 20.00 (86.96%)                    | 25.00 (92.59%)                  |                       |
| Mild difficulty                                              |          | 3.00 (13.04%)                     | 1.00 (3.70%)                    |                       |
| Moderate difficulty                                          |          | 0.00 (0.00%)                      | 1.00 (3.70%)                    |                       |
| <b>Changing basic body position (d410), capacity (t1)</b>    | 50       |                                   |                                 | 0.322                 |
| No difficulty                                                |          | 20.00 (86.96%)                    | 25.00 (92.59%)                  |                       |
| Mild difficulty                                              |          | 3.00 (13.04%)                     | 1.00 (3.70%)                    |                       |
| Moderate difficulty                                          |          | 0.00 (0.00%)                      | 1.00 (3.70%)                    |                       |
| <b>Changing basic body position (d410), performance (t2)</b> | 50       |                                   |                                 | 1.000                 |
| No difficulty                                                |          | 22.00 (95.65%)                    | 26.00 (96.30%)                  |                       |
| Mild difficulty                                              |          | 1.00 (4.35%)                      | 1.00 (3.70%)                    |                       |
| <b>Changing basic body position (d410), capacity (t2)</b>    | 50       |                                   |                                 | 1.000                 |
| No difficulty                                                |          | 22.00 (95.65%)                    | 26.00 (96.30%)                  |                       |
| Mild difficulty                                              |          | 1.00 (4.35%)                      | 1.00 (3.70%)                    |                       |
| <b>Maintaining a body position (d415), performance (t1)</b>  | 50       |                                   |                                 | 1.000                 |
| No difficulty                                                |          | 22.00 (95.65%)                    | 25.00 (92.59%)                  |                       |
| Mild difficulty                                              |          | 1.00 (4.35%)                      | 2.00 (7.41%)                    |                       |

| <i>Characteristic</i>                                       | <i>N</i> | <i>Sex</i>                        |                                 | <i>p</i> <sup>2</sup> |
|-------------------------------------------------------------|----------|-----------------------------------|---------------------------------|-----------------------|
|                                                             |          | <i>female, n = 23<sup>1</sup></i> | <i>male, n = 27<sup>1</sup></i> |                       |
| <b>Maintaining a body position (d415), capacity (t1)</b>    | 50       |                                   |                                 | 1.000                 |
| No difficulty                                               |          | 22.00 (95.65%)                    | 25.00 (92.59%)                  |                       |
| Mild difficulty                                             |          | 1.00 (4.35%)                      | 2.00 (7.41%)                    |                       |
| <b>Maintaining a body position (d415), performance (t2)</b> | 50       |                                   |                                 | 1.000                 |
| No difficulty                                               |          | 22.00 (95.65%)                    | 26.00 (96.30%)                  |                       |
| Mild difficulty                                             |          | 1.00 (4.35%)                      | 1.00 (3.70%)                    |                       |
| <b>Maintaining a body position (d415), capacity (t2)</b>    | 50       |                                   |                                 | 1.000                 |
| No difficulty                                               |          | 22.00 (95.65%)                    | 26.00 (96.30%)                  |                       |
| Mild difficulty                                             |          | 1.00 (4.35%)                      | 1.00 (3.70%)                    |                       |
| <b>Transferring oneself (d420), performance (t1)</b>        | 50       |                                   |                                 | 0.515                 |
| No difficulty                                               |          | 6.00 (26.09%)                     | 11.00 (40.74%)                  |                       |
| Mild difficulty                                             |          | 14.00 (60.87%)                    | 15.00 (55.56%)                  |                       |
| Moderate difficulty                                         |          | 2.00 (8.70%)                      | 1.00 (3.70%)                    |                       |
| Severe difficulty                                           |          | 1.00 (4.35%)                      | 0.00 (0.00%)                    |                       |
| <b>Transferring oneself (d420), capacity (t1)</b>           | 50       |                                   |                                 | 0.515                 |
| No difficulty                                               |          | 6.00 (26.09%)                     | 11.00 (40.74%)                  |                       |
| Mild difficulty                                             |          | 14.00 (60.87%)                    | 15.00 (55.56%)                  |                       |
| Moderate difficulty                                         |          | 2.00 (8.70%)                      | 1.00 (3.70%)                    |                       |
| Severe difficulty                                           |          | 1.00 (4.35%)                      | 0.00 (0.00%)                    |                       |
| <b>Transferring oneself (d420), performance (t2)</b>        | 50       |                                   |                                 | 0.435                 |
| No difficulty                                               |          | 6.00 (26.09%)                     | 12.00 (44.44%)                  |                       |
| Mild difficulty                                             |          | 14.00 (60.87%)                    | 14.00 (51.85%)                  |                       |

| <i>Characteristic</i>                                | <i>N</i> | <i>Sex</i>                        |                                 | <i>p</i> <sup>2</sup> |
|------------------------------------------------------|----------|-----------------------------------|---------------------------------|-----------------------|
|                                                      |          | <i>female, n = 23<sup>l</sup></i> | <i>male, n = 27<sup>l</sup></i> |                       |
| Moderate difficulty                                  |          | 2.00 (8.70%)                      | 1.00 (3.70%)                    |                       |
| Severe difficulty                                    |          | 1.00 (4.35%)                      | 0.00 (0.00%)                    |                       |
| <b>Transferring oneself (d420), capacity (t2)</b>    | 50       |                                   |                                 | 0.435                 |
| No difficulty                                        |          | 6.00 (26.09%)                     | 12.00 (44.44%)                  |                       |
| Mild difficulty                                      |          | 14.00 (60.87%)                    | 14.00 (51.85%)                  |                       |
| Moderate difficulty                                  |          | 2.00 (8.70%)                      | 1.00 (3.70%)                    |                       |
| Severe difficulty                                    |          | 1.00 (4.35%)                      | 0.00 (0.00%)                    |                       |
| <b>Walking (d450), performance (t1)</b>              | 50       |                                   |                                 | 0.614                 |
| No difficulty                                        |          | 22.00 (95.65%)                    | 24.00 (88.89%)                  |                       |
| Mild difficulty                                      |          | 1.00 (4.35%)                      | 3.00 (11.11%)                   |                       |
| <b>Walking (d450), capacity (t1)</b>                 | 50       |                                   |                                 | 0.614                 |
| No difficulty                                        |          | 22.00 (95.65%)                    | 24.00 (88.89%)                  |                       |
| Mild difficulty                                      |          | 1.00 (4.35%)                      | 3.00 (11.11%)                   |                       |
| <b>Walking (d450), performance (t2)</b>              | 50       |                                   |                                 | 0.493                 |
| No difficulty                                        |          | 23.00 (100.00%)                   | 25.00 (92.59%)                  |                       |
| Mild difficulty                                      |          | 0.00 (0.00%)                      | 2.00 (7.41%)                    |                       |
| <b>Walking (d450), capacity (t2)</b>                 | 50       |                                   |                                 | 0.493                 |
| No difficulty                                        |          | 23.00 (100.00%)                   | 25.00 (92.59%)                  |                       |
| Mild difficulty                                      |          | 0.00 (0.00%)                      | 2.00 (7.41%)                    |                       |
| <b>Using transportation (d470), performance (t1)</b> | 50       |                                   |                                 | 0.237                 |
| No difficulty                                        |          | 3.00 (13.04%)                     | 8.00 (29.63%)                   |                       |
| Mild difficulty                                      |          | 19.00 (82.61%)                    | 19.00 (70.37%)                  |                       |



| <i>Characteristic</i>                                | <i>N</i> | <i>Sex</i>                        |                                 | <i>p</i> <sup>2</sup> |
|------------------------------------------------------|----------|-----------------------------------|---------------------------------|-----------------------|
|                                                      |          | <i>female, n = 23<sup>1</sup></i> | <i>male, n = 27<sup>1</sup></i> |                       |
| Moderate difficulty                                  |          | 1.00 (4.35%)                      | 0.00 (0.00%)                    |                       |
| <b>Using transportation (d470), capacity (t1)</b>    | 50       |                                   |                                 | 0.237                 |
| No difficulty                                        |          | 3.00 (13.04%)                     | 8.00 (29.63%)                   |                       |
| Mild difficulty                                      |          | 19.00 (82.61%)                    | 19.00 (70.37%)                  |                       |
| Moderate difficulty                                  |          | 1.00 (4.35%)                      | 0.00 (0.00%)                    |                       |
| <b>Using transportation (d470), performance (t2)</b> | 50       |                                   |                                 | 0.079                 |
| No difficulty                                        |          | 3.00 (13.04%)                     | 10.00 (37.04%)                  |                       |
| Mild difficulty                                      |          | 19.00 (82.61%)                    | 17.00 (62.96%)                  |                       |
| Moderate difficulty                                  |          | 1.00 (4.35%)                      | 0.00 (0.00%)                    |                       |
| <b>Using transportation (d470), capacity (t2)</b>    | 50       |                                   |                                 | 0.079                 |
| No difficulty                                        |          | 3.00 (13.04%)                     | 10.00 (37.04%)                  |                       |
| Mild difficulty                                      |          | 19.00 (82.61%)                    | 17.00 (62.96%)                  |                       |
| Moderate difficulty                                  |          | 1.00 (4.35%)                      | 0.00 (0.00%)                    |                       |
| <b>Washing oneself (d510), performance (t1)</b>      | 50       |                                   |                                 | 0.690                 |
| No difficulty                                        |          | 1.00 (4.35%)                      | 3.00 (11.11%)                   |                       |
| Mild difficulty                                      |          | 18.00 (78.26%)                    | 21.00 (77.78%)                  |                       |
| Moderate difficulty                                  |          | 4.00 (17.39%)                     | 3.00 (11.11%)                   |                       |
| <b>Washing oneself (d510), capacity (t1)</b>         | 50       |                                   |                                 | 0.690                 |
| No difficulty                                        |          | 1.00 (4.35%)                      | 3.00 (11.11%)                   |                       |
| Mild difficulty                                      |          | 18.00 (78.26%)                    | 21.00 (77.78%)                  |                       |
| Moderate difficulty                                  |          | 4.00 (17.39%)                     | 3.00 (11.11%)                   |                       |
| <b>Washing oneself (d510), performance (t2)</b>      | 50       |                                   |                                 | 1.000                 |

| <i>Characteristic</i>                                 | <i>N</i> | <i>Sex</i>                        |                                 | <i>p</i> <sup>2</sup> |
|-------------------------------------------------------|----------|-----------------------------------|---------------------------------|-----------------------|
|                                                       |          | <i>female, n = 23<sup>l</sup></i> | <i>male, n = 27<sup>l</sup></i> |                       |
| No difficulty                                         |          | 20.00 (86.96%)                    | 22.00 (81.48%)                  |                       |
| Mild difficulty                                       |          | 3.00 (13.04%)                     | 4.00 (14.81%)                   |                       |
| Moderate difficulty                                   |          | 0.00 (0.00%)                      | 1.00 (3.70%)                    |                       |
| <b>Washing oneself (d510), capacity (t2)</b>          | 50       |                                   |                                 | 1.000                 |
| No difficulty                                         |          | 20.00 (86.96%)                    | 22.00 (81.48%)                  |                       |
| Mild difficulty                                       |          | 3.00 (13.04%)                     | 4.00 (14.81%)                   |                       |
| Moderate difficulty                                   |          | 0.00 (0.00%)                      | 1.00 (3.70%)                    |                       |
| <b>Caring for body parts (d520), performance (t1)</b> | 50       |                                   |                                 | 1.000                 |
| No difficulty                                         |          | 22.00 (95.65%)                    | 25.00 (92.59%)                  |                       |
| Mild difficulty                                       |          | 1.00 (4.35%)                      | 2.00 (7.41%)                    |                       |
| <b>Caring for body parts (d520), capacity (t1)</b>    | 50       |                                   |                                 | 1.000                 |
| No difficulty                                         |          | 22.00 (95.65%)                    | 25.00 (92.59%)                  |                       |
| Mild difficulty                                       |          | 1.00 (4.35%)                      | 2.00 (7.41%)                    |                       |
| <b>Caring for body parts (d520), performance (t2)</b> | 50       |                                   |                                 |                       |
| No difficulty                                         |          | 23.00 (100.00%)                   | 27.00 (100.00%)                 | -                     |
| <b>Caring for body parts (d520), capacity (t2)</b>    | 50       |                                   |                                 |                       |
| No difficulty                                         |          | 23.00 (100.00%)                   | 27.00 (100.00%)                 | -                     |
| <b>Toileting (d530), performance (t1)</b>             | 50       |                                   |                                 | 1.000                 |
| No difficulty                                         |          | 23.00 (100.00%)                   | 26.00 (96.30%)                  |                       |
| Mild difficulty                                       |          | 0.00 (0.00%)                      | 1.00 (3.70%)                    |                       |
| <b>Toileting (d530), capacity (t1)</b>                | 50       |                                   |                                 | 1.000                 |
| No difficulty                                         |          | 23.00 (100.00%)                   | 26.00 (96.30%)                  |                       |

| <i>Characteristic</i>                     | <i>N</i> | <i>Sex</i>                        |                                 | <i>p</i> <sup>2</sup> |
|-------------------------------------------|----------|-----------------------------------|---------------------------------|-----------------------|
|                                           |          | <i>female, n = 23<sup>l</sup></i> | <i>male, n = 27<sup>l</sup></i> |                       |
| Mild difficulty                           |          | 0.00 (0.00%)                      | 1.00 (3.70%)                    |                       |
| <b>Toileting (d530), performance (t2)</b> | 50       |                                   |                                 | 1.000                 |
| No difficulty                             |          | 23.00 (100.00%)                   | 26.00 (96.30%)                  |                       |
| Mild difficulty                           |          | 0.00 (0.00%)                      | 1.00 (3.70%)                    |                       |
| <b>Toileting (d530), capacity (t2)</b>    | 50       |                                   |                                 | 1.000                 |
| No difficulty                             |          | 23.00 (100.00%)                   | 26.00 (96.30%)                  |                       |
| Mild difficulty                           |          | 0.00 (0.00%)                      | 1.00 (3.70%)                    |                       |
| <b>Dressing (d540), performance (t1)</b>  | 50       |                                   |                                 | 0.475                 |
| No difficulty                             |          | 1.00 (4.35%)                      | 0.00 (0.00%)                    |                       |
| Mild difficulty                           |          | 17.00 (73.91%)                    | 23.00 (85.19%)                  |                       |
| Moderate difficulty                       |          | 5.00 (21.74%)                     | 4.00 (14.81%)                   |                       |
| <b>Dressing (d540), capacity (t1)</b>     | 50       |                                   |                                 | 0.475                 |
| No difficulty                             |          | 1.00 (4.35%)                      | 0.00 (0.00%)                    |                       |
| Mild difficulty                           |          | 17.00 (73.91%)                    | 23.00 (85.19%)                  |                       |
| Moderate difficulty                       |          | 5.00 (21.74%)                     | 4.00 (14.81%)                   |                       |
| <b>Dressing (d540), performance (t2)</b>  | 50       |                                   |                                 | 1.000                 |
| No difficulty                             |          | 20.00 (86.96%)                    | 24.00 (88.89%)                  |                       |
| Mild difficulty                           |          | 3.00 (13.04%)                     | 3.00 (11.11%)                   |                       |
| <b>Dressing (d540), capacity (t2)</b>     | 50       |                                   |                                 | 1.000                 |
| No difficulty                             |          | 20.00 (86.96%)                    | 24.00 (88.89%)                  |                       |
| Mild difficulty                           |          | 3.00 (13.04%)                     | 3.00 (11.11%)                   |                       |
| <b>Eating (d550), performance (t1)</b>    | 50       |                                   |                                 | 1.000                 |

| <i>Characteristic</i>                                      | <i>N</i>  | <i>Sex</i>                        |                                 | <i>p</i> <sup>2</sup> |
|------------------------------------------------------------|-----------|-----------------------------------|---------------------------------|-----------------------|
|                                                            |           | <i>female, n = 23<sup>1</sup></i> | <i>male, n = 27<sup>1</sup></i> |                       |
| No difficulty                                              |           | 22.00 (95.65%)                    | 25.00 (92.59%)                  |                       |
| Mild difficulty                                            |           | 1.00 (4.35%)                      | 1.00 (3.70%)                    |                       |
| Moderate difficulty                                        |           | 0.00 (0.00%)                      | 1.00 (3.70%)                    |                       |
| <b>Eating (d550), capacity (t1)</b>                        | <b>50</b> |                                   |                                 | <b>1.000</b>          |
| No difficulty                                              |           | 22.00 (95.65%)                    | 25.00 (92.59%)                  |                       |
| Mild difficulty                                            |           | 1.00 (4.35%)                      | 1.00 (3.70%)                    |                       |
| Moderate difficulty                                        |           | 0.00 (0.00%)                      | 1.00 (3.70%)                    |                       |
| <b>Eating (d550), performance (t2)</b>                     | <b>50</b> |                                   |                                 | <b>1.000</b>          |
| No difficulty                                              |           | 23.00 (100.00%)                   | 26.00 (96.30%)                  |                       |
| Mild difficulty                                            |           | 0.00 (0.00%)                      | 1.00 (3.70%)                    |                       |
| <b>Eating (d550), capacity (t2)</b>                        | <b>50</b> |                                   |                                 | <b>1.000</b>          |
| No difficulty                                              |           | 23.00 (100.00%)                   | 26.00 (96.30%)                  |                       |
| Mild difficulty                                            |           | 0.00 (0.00%)                      | 1.00 (3.70%)                    |                       |
| <b>Looking after one's health (d570), performance (t1)</b> | <b>50</b> |                                   |                                 | <b>0.111</b>          |
| Mild difficulty                                            |           | 2.00 (8.70%)                      | 9.00 (33.33%)                   |                       |
| Moderate difficulty                                        |           | 12.00 (52.17%)                    | 10.00 (37.04%)                  |                       |
| Severe difficulty                                          |           | 9.00 (39.13%)                     | 8.00 (29.63%)                   |                       |
| <b>Looking after one's health (d570), capacity (t1)</b>    | <b>50</b> |                                   |                                 | <b>0.111</b>          |
| Mild difficulty                                            |           | 2.00 (8.70%)                      | 9.00 (33.33%)                   |                       |
| Moderate difficulty                                        |           | 12.00 (52.17%)                    | 10.00 (37.04%)                  |                       |
| Severe difficulty                                          |           | 9.00 (39.13%)                     | 8.00 (29.63%)                   |                       |
| <b>Looking after one's health (d570), performance (t2)</b> | <b>50</b> |                                   |                                 | <b>0.483</b>          |

| <i>Characteristic</i>                                   | <i>N</i>  | <i>Sex</i>                        |                                 | <i>p</i> <sup>2</sup> |
|---------------------------------------------------------|-----------|-----------------------------------|---------------------------------|-----------------------|
|                                                         |           | <i>female, n = 23<sup>l</sup></i> | <i>male, n = 27<sup>l</sup></i> |                       |
| Mild difficulty                                         |           | 4.00 (17.39%)                     | 8.00 (29.63%)                   |                       |
| Moderate difficulty                                     |           | 10.00 (43.48%)                    | 12.00 (44.44%)                  |                       |
| Severe difficulty                                       |           | 9.00 (39.13%)                     | 7.00 (25.93%)                   |                       |
| <b>Looking after one's health (d570), capacity (t2)</b> | <b>50</b> |                                   |                                 | <b>0.483</b>          |
| Mild difficulty                                         |           | 4.00 (17.39%)                     | 8.00 (29.63%)                   |                       |
| Moderate difficulty                                     |           | 10.00 (43.48%)                    | 12.00 (44.44%)                  |                       |
| Severe difficulty                                       |           | 9.00 (39.13%)                     | 7.00 (25.93%)                   |                       |
| <b>Doing housework (d640), performance (t1)</b>         | <b>50</b> |                                   |                                 | <b>0.157</b>          |
| No difficulty                                           |           | 1.00 (4.35%)                      | 5.00 (18.52%)                   |                       |
| Mild difficulty                                         |           | 14.00 (60.87%)                    | 17.00 (62.96%)                  |                       |
| Moderate difficulty                                     |           | 8.00 (34.78%)                     | 4.00 (14.81%)                   |                       |
| Severe difficulty                                       |           | 0.00 (0.00%)                      | 1.00 (3.70%)                    |                       |
| <b>Doing housework (d640), capacity (t1)</b>            | <b>50</b> |                                   |                                 | <b>0.157</b>          |
| No difficulty                                           |           | 1.00 (4.35%)                      | 5.00 (18.52%)                   |                       |
| Mild difficulty                                         |           | 14.00 (60.87%)                    | 17.00 (62.96%)                  |                       |
| Moderate difficulty                                     |           | 8.00 (34.78%)                     | 4.00 (14.81%)                   |                       |
| Severe difficulty                                       |           | 0.00 (0.00%)                      | 1.00 (3.70%)                    |                       |
| <b>Doing housework (d640), performance (t2)</b>         | <b>50</b> |                                   |                                 | <b>0.157</b>          |
| No difficulty                                           |           | 1.00 (4.35%)                      | 5.00 (18.52%)                   |                       |
| Mild difficulty                                         |           | 14.00 (60.87%)                    | 17.00 (62.96%)                  |                       |
| Moderate difficulty                                     |           | 8.00 (34.78%)                     | 4.00 (14.81%)                   |                       |
| Severe difficulty                                       |           | 0.00 (0.00%)                      | 1.00 (3.70%)                    |                       |

| <i>Characteristic</i>                                            | <i>N</i> | <i>Sex</i>                        |                                 | <i>p</i> <sup>2</sup> |
|------------------------------------------------------------------|----------|-----------------------------------|---------------------------------|-----------------------|
|                                                                  |          | <i>female, n = 23<sup>l</sup></i> | <i>male, n = 27<sup>l</sup></i> |                       |
| <b>Doing housework (d640), capacity (t2)</b>                     | 50       |                                   |                                 | 0.157                 |
| No difficulty                                                    |          | 1.00 (4.35%)                      | 5.00 (18.52%)                   |                       |
| Mild difficulty                                                  |          | 14.00 (60.87%)                    | 17.00 (62.96%)                  |                       |
| Moderate difficulty                                              |          | 8.00 (34.78%)                     | 4.00 (14.81%)                   |                       |
| Severe difficulty                                                |          | 0.00 (0.00%)                      | 1.00 (3.70%)                    |                       |
| <b>Assisting others (d660), performance (t1)</b>                 | 50       |                                   |                                 | 0.711                 |
| No difficulty                                                    |          | 20.00 (86.96%)                    | 22.00 (81.48%)                  |                       |
| Mild difficulty                                                  |          | 3.00 (13.04%)                     | 5.00 (18.52%)                   |                       |
| <b>Assisting others (d660), capacity (t1)</b>                    | 50       |                                   |                                 | 0.711                 |
| No difficulty                                                    |          | 20.00 (86.96%)                    | 22.00 (81.48%)                  |                       |
| Mild difficulty                                                  |          | 3.00 (13.04%)                     | 5.00 (18.52%)                   |                       |
| <b>Assisting others (d660), performance (t2)</b>                 | 50       |                                   |                                 | 0.711                 |
| No difficulty                                                    |          | 20.00 (86.96%)                    | 22.00 (81.48%)                  |                       |
| Mild difficulty                                                  |          | 3.00 (13.04%)                     | 5.00 (18.52%)                   |                       |
| <b>Assisting others (d660), capacity (t2)</b>                    | 50       |                                   |                                 | 0.711                 |
| No difficulty                                                    |          | 20.00 (86.96%)                    | 22.00 (81.48%)                  |                       |
| Mild difficulty                                                  |          | 3.00 (13.04%)                     | 5.00 (18.52%)                   |                       |
| <b>Basic interpersonal interactions (d710), performance (t1)</b> | 50       |                                   |                                 | 0.711                 |
| No difficulty                                                    |          | 20.00 (86.96%)                    | 22.00 (81.48%)                  |                       |
| Mild difficulty                                                  |          | 3.00 (13.04%)                     | 5.00 (18.52%)                   |                       |
| <b>Basic interpersonal interactions (d710), capacity (t1)</b>    | 50       |                                   |                                 | 0.711                 |
| No difficulty                                                    |          | 20.00 (86.96%)                    | 22.00 (81.48%)                  |                       |

| <i>Characteristic</i>                                            | <i>N</i> | <i>Sex</i>                        |                                 | <i>p</i> <sup>2</sup> |
|------------------------------------------------------------------|----------|-----------------------------------|---------------------------------|-----------------------|
|                                                                  |          | <i>female, n = 23<sup>l</sup></i> | <i>male, n = 27<sup>l</sup></i> |                       |
| Mild difficulty                                                  |          | 3.00 (13.04%)                     | 5.00 (18.52%)                   |                       |
| <b>Basic interpersonal interactions (d710), performance (t2)</b> | 50       |                                   |                                 | 0.711                 |
| No difficulty                                                    |          | 20.00 (86.96%)                    | 22.00 (81.48%)                  |                       |
| Mild difficulty                                                  |          | 3.00 (13.04%)                     | 5.00 (18.52%)                   |                       |
| <b>Basic interpersonal interactions (d710), capacity (t2)</b>    | 50       |                                   |                                 | 0.711                 |
| No difficulty                                                    |          | 20.00 (86.96%)                    | 22.00 (81.48%)                  |                       |
| Mild difficulty                                                  |          | 3.00 (13.04%)                     | 5.00 (18.52%)                   |                       |
| <b>Intimate relationships (d770), performance (t1)</b>           | 50       |                                   |                                 | <b>0.014</b>          |
| No difficulty                                                    |          | 22.00 (95.65%)                    | 18.00 (66.67%)                  |                       |
| Mild difficulty                                                  |          | 1.00 (4.35%)                      | 9.00 (33.33%)                   |                       |
| <b>Intimate relationships (d770), capacity (t1)</b>              | 50       |                                   |                                 | <b>0.014</b>          |
| No difficulty                                                    |          | 22.00 (95.65%)                    | 18.00 (66.67%)                  |                       |
| Mild difficulty                                                  |          | 1.00 (4.35%)                      | 9.00 (33.33%)                   |                       |
| <b>Intimate relationships (d770), performance (t2)</b>           | 50       |                                   |                                 | <b>0.014</b>          |
| No difficulty                                                    |          | 22.00 (95.65%)                    | 18.00 (66.67%)                  |                       |
| Mild difficulty                                                  |          | 1.00 (4.35%)                      | 9.00 (33.33%)                   |                       |
| <b>Intimate relationships (d770), capacity (t2)</b>              | 50       |                                   |                                 | <b>0.014</b>          |
| No difficulty                                                    |          | 22.00 (95.65%)                    | 18.00 (66.67%)                  |                       |
| Mild difficulty                                                  |          | 1.00 (4.35%)                      | 9.00 (33.33%)                   |                       |
| <b>Remunerative employment (d850), performance (t1)</b>          | 50       |                                   |                                 | 0.399                 |
| No difficulty                                                    |          | 1.00 (4.35%)                      | 4.00 (14.81%)                   |                       |
| Mild difficulty                                                  |          | 20.00 (86.96%)                    | 18.00 (66.67%)                  |                       |

| <i>Characteristic</i>                                   | <i>N</i> | <i>Sex</i>                        |                                 | <i>p</i> <sup>2</sup> |
|---------------------------------------------------------|----------|-----------------------------------|---------------------------------|-----------------------|
|                                                         |          | <i>female, n = 23<sup>l</sup></i> | <i>male, n = 27<sup>l</sup></i> |                       |
| Moderate difficulty                                     |          | 2.00 (8.70%)                      | 3.00 (11.11%)                   |                       |
| Severe difficulty                                       |          | 0.00 (0.00%)                      | 2.00 (7.41%)                    |                       |
| <b>Remunerative employment (d850), capacity (t1)</b>    | 50       |                                   |                                 | 0.399                 |
| Mild difficulty                                         |          | 20.00 (86.96%)                    | 18.00 (66.67%)                  |                       |
| Moderate difficulty                                     |          | 2.00 (8.70%)                      | 3.00 (11.11%)                   |                       |
| No difficulty                                           |          | 1.00 (4.35%)                      | 4.00 (14.81%)                   |                       |
| Severe difficulty                                       |          | 0.00 (0.00%)                      | 2.00 (7.41%)                    |                       |
| <b>Remunerative employment (d850), performance (t2)</b> | 50       |                                   |                                 | 0.399                 |
| No difficulty                                           |          | 1.00 (4.35%)                      | 4.00 (14.81%)                   |                       |
| Mild difficulty                                         |          | 20.00 (86.96%)                    | 18.00 (66.67%)                  |                       |
| Moderate difficulty                                     |          | 2.00 (8.70%)                      | 3.00 (11.11%)                   |                       |
| Severe difficulty                                       |          | 0.00 (0.00%)                      | 2.00 (7.41%)                    |                       |
| <b>Remunerative employment (d850), capacity (t2)</b>    | 50       |                                   |                                 | 0.399                 |
| No difficulty                                           |          | 1.00 (4.35%)                      | 4.00 (14.81%)                   |                       |
| Mild difficulty                                         |          | 20.00 (86.96%)                    | 18.00 (66.67%)                  |                       |
| Moderate difficulty                                     |          | 2.00 (8.70%)                      | 3.00 (11.11%)                   |                       |
| Severe difficulty                                       |          | 0.00 (0.00%)                      | 2.00 (7.41%)                    |                       |
| <b>Recreation and leisure (d920), performance (t1)</b>  | 50       |                                   |                                 | 0.287                 |
| No difficulty                                           |          | 11.00 (47.83%)                    | 15.00 (55.56%)                  |                       |
| Mild difficulty                                         |          | 11.00 (47.83%)                    | 7.00 (25.93%)                   |                       |
| Moderate difficulty                                     |          | 1.00 (4.35%)                      | 3.00 (11.11%)                   |                       |
| Severe difficulty                                       |          | 0.00 (0.00%)                      | 2.00 (7.41%)                    |                       |



| <i>Characteristic</i>                                  | <i>N</i> | <i>Sex</i>                         |                                  | <i>p</i> <sup>2</sup> |
|--------------------------------------------------------|----------|------------------------------------|----------------------------------|-----------------------|
|                                                        |          | <i>female, n = 23</i> <sup>1</sup> | <i>male, n = 27</i> <sup>1</sup> |                       |
| <b>Recreation and leisure (d920), capacity (t1)</b>    | 50       |                                    |                                  | 0.287                 |
| No difficulty                                          |          | 11.00 (47.83%)                     | 15.00 (55.56%)                   |                       |
| Mild difficulty                                        |          | 11.00 (47.83%)                     | 7.00 (25.93%)                    |                       |
| Moderate difficulty                                    |          | 1.00 (4.35%)                       | 3.00 (11.11%)                    |                       |
| Severe difficulty                                      |          | 0.00 (0.00%)                       | 2.00 (7.41%)                     |                       |
| <b>Recreation and leisure (d920), performance (t2)</b> | 50       |                                    |                                  | 0.469                 |
| No difficulty                                          |          | 11.00 (47.83%)                     | 15.00 (55.56%)                   |                       |
| Mild difficulty                                        |          | 11.00 (47.83%)                     | 8.00 (29.63%)                    |                       |
| Moderate difficulty                                    |          | 1.00 (4.35%)                       | 2.00 (7.41%)                     |                       |
| Severe difficulty                                      |          | 0.00 (0.00%)                       | 2.00 (7.41%)                     |                       |
| <b>Recreation and leisure (d920), performance (t2)</b> | 50       |                                    |                                  | 0.469                 |
| No difficulty                                          |          | 11.00 (47.83%)                     | 15.00 (55.56%)                   |                       |
| Mild difficulty                                        |          | 11.00 (47.83%)                     | 8.00 (29.63%)                    |                       |
| Moderate difficulty                                    |          | 1.00 (4.35%)                       | 2.00 (7.41%)                     |                       |
| Severe difficulty                                      |          | 0.00 (0.00%)                       | 2.00 (7.41%)                     |                       |

<sup>1</sup> *n* (%)

<sup>2</sup> Fisher's exact test;

<sup>3</sup> Pearson's Chi-squared test

<sup>4</sup> Proportion test

## Supplementary Materials S2

### *Analysis of the distribution of the results of the ICF questionnaire by the locations of the lesions*

**Table S2.** Distribution of selected ICF body function and activities and participation results variables by the location of the lesions at the time points 1 day after surgery (t1) and on the day of discharge (t2).

| <i>Characteristic</i>                           | <i>N</i> | <i>Location of the lesions</i>  |                                  | <i>p</i> <sup>2</sup> |
|-------------------------------------------------|----------|---------------------------------|----------------------------------|-----------------------|
|                                                 |          | <i>left, n = 26<sup>l</sup></i> | <i>right, n = 24<sup>l</sup></i> |                       |
| <b>Sensation of pain (b280) (t1)</b>            | 50       |                                 |                                  | 0.600                 |
| Mild impairment                                 |          | 0.00 (0.00%)                    | 1.00 (4.17%)                     |                       |
| Moderate impairment                             |          | 24.00 (92.31%)                  | 19.00 (79.17%)                   |                       |
| Severe impairment                               |          | 1.00 (3.85%)                    | 3.00 (12.50%)                    |                       |
| Complete impairment                             |          | 1.00 (3.85%)                    | 1.00 (4.17%)                     |                       |
| <b>Sensation of pain (b280) (t2)</b>            | 50       |                                 |                                  | 1.00                  |
| No impairment                                   |          | 1.00 (3.85%)                    | 1.00 (4.17%)                     |                       |
| Mild impairment                                 |          | 21.00 (80.77%)                  | 20.00 (83.33%)                   |                       |
| Moderate impairment                             |          | 4.00 (15.38%)                   | 3.00 (12.50%)                    |                       |
| <b>Exercise-tolerance functions (b455) (t1)</b> | 50       |                                 |                                  | 0.266                 |
| Mild impairment                                 |          | 7.00 (26.92%)                   | 3.00 (12.50%)                    |                       |
| Moderate impairment                             |          | 7.00 (26.92%)                   | 10.00 (41.67%)                   |                       |
| Severe impairment                               |          | 9.00 (34.62%)                   | 5.00 (20.83%)                    |                       |
| Complete impairment                             |          | 3.00 (11.54%)                   | 6.00 (25.00%)                    |                       |
| <b>Exercise-tolerance functions (b455) (t2)</b> | 50       |                                 |                                  | 0.701                 |
| No impairment                                   |          | 11.00 (42.31%)                  | 8.00 (33.33%)                    |                       |
| Mild impairment                                 |          | 8.00 (30.77%)                   | 7.00 (29.17%)                    |                       |
| Moderate impairment                             |          | 7.00 (26.92%)                   | 9.00 (37.50%)                    |                       |
| <b>Mobility-of-joint functions (b710) (t1)</b>  | 50       |                                 |                                  | 0.393                 |
| No impairment                                   |          | 3.00 (11.54%)                   | 0.00 (0.00%)                     |                       |
| Mild impairment                                 |          | 12.00 (46.15%)                  | 15.00 (62.50%)                   |                       |
| Moderate impairment                             |          | 7.00 (26.92%)                   | 5.00 (20.83%)                    |                       |

| <i>Characteristic</i>                           | <i>N</i> | <i>Location of the lesions</i>  |                                  | <i>p</i> <sup>2</sup> |
|-------------------------------------------------|----------|---------------------------------|----------------------------------|-----------------------|
|                                                 |          | <i>left, n = 26<sup>l</sup></i> | <i>right, n = 24<sup>l</sup></i> |                       |
| Severe impairment                               |          | 4.00 (15.38%)                   | 4.00 (16.67%)                    |                       |
| <b>Mobility-of-joint functions (b710) (t2)</b>  | 50       |                                 |                                  | 0.901                 |
| No impairment                                   |          | 18.00 (69.23%)                  | 16.00 (66.67%)                   |                       |
| Mild impairment                                 |          | 7.00 (26.92%)                   | 6.00 (25.00%)                    |                       |
| Moderate impairment                             |          | 1.00 (3.85%)                    | 2.00 (8.33%)                     |                       |
| <b>Muscle-power functions (b730) (t1)</b>       | 50       |                                 |                                  | 1.00                  |
| No impairment                                   |          | 11.00 (42.31%)                  | 11.00 (45.83%)                   |                       |
| Mild impairment                                 |          | 11.00 (42.31%)                  | 11.00 (45.83%)                   |                       |
| Moderate impairment                             |          | 3.00 (11.54%)                   | 2.00 (8.33%)                     |                       |
| Severe impairment                               |          | 1.00 (3.85%)                    | 0.00 (0.00%)                     |                       |
| <b>Muscle-power functions (b730) (t2)</b>       | 50       |                                 |                                  | 1.00                  |
| No impairment                                   |          | 24.00 (92.31%)                  | 23.00 (95.83%)                   |                       |
| Mild impairment                                 |          | 2.00 (7.69%)                    | 1.00 (4.17%)                     |                       |
| <b>Washing oneself (d510), performance (t1)</b> | 50       |                                 |                                  | 0.773                 |
| No difficulty                                   |          | 3.00 (11.54%)                   | 1.00 (4.17%)                     |                       |
| Mild difficulty                                 |          | 19.00 (73.08%)                  | 20.00 (83.33%)                   |                       |
| Moderate difficulty                             |          | 4.00 (15.38%)                   | 3.00 (12.50%)                    |                       |
| <b>Washing oneself (d510), capacity (t1)</b>    | 50       |                                 |                                  | 0.773                 |
| No difficulty                                   |          | 3.00 (11.54%)                   | 1.00 (4.17%)                     |                       |
| Mild difficulty                                 |          | 19.00 (73.08%)                  | 20.00 (83.33%)                   |                       |
| Moderate difficulty                             |          | 4.00 (15.38%)                   | 3.00 (12.50%)                    |                       |
| <b>Washing oneself (d510), performance (t2)</b> | 50       |                                 |                                  | 1.00                  |

| <i>Characteristic</i>                                 | <i>N</i> | <i>Location of the lesions</i>  |                                  | <i>p</i> <sup>2</sup> |
|-------------------------------------------------------|----------|---------------------------------|----------------------------------|-----------------------|
|                                                       |          | <i>left, n = 26<sup>l</sup></i> | <i>right, n = 24<sup>l</sup></i> |                       |
| No difficulty                                         |          | 21.00 (80.77%)                  | 21.00 (87.50%)                   |                       |
| Mild difficulty                                       |          | 4.00 (15.38%)                   | 3.00 (12.50%)                    |                       |
| Moderate difficulty                                   |          | 1.00 (3.85%)                    | 0.00 (0.00%)                     |                       |
| <b>Washing oneself (d510), capacity (t2)</b>          | 50       |                                 |                                  | 1.00                  |
| No difficulty                                         |          | 21.00 (80.77%)                  | 21.00 (87.50%)                   |                       |
| Mild difficulty                                       |          | 4.00 (15.38%)                   | 3.00 (12.50%)                    |                       |
| Moderate difficulty                                   |          | 1.00 (3.85%)                    | 0.00 (0.00%)                     |                       |
| <b>Caring for body parts (d520), performance (t1)</b> | 50       |                                 |                                  | 1.00                  |
| No difficulty                                         |          | 24.00 (92.31%)                  | 23.00 (95.83%)                   |                       |
| Mild difficulty                                       |          | 2.00 (7.69%)                    | 1.00 (4.17%)                     |                       |
| <b>Caring for body parts (d520), capacity (t1)</b>    | 50       |                                 |                                  | 1.00                  |
| No difficulty                                         |          | 24.00 (92.31%)                  | 23.00 (95.83%)                   |                       |
| Mild difficulty                                       |          | 2.00 (7.69%)                    | 1.00 (4.17%)                     |                       |
| <b>Caring for body parts (d520), performance (t2)</b> | 50       |                                 |                                  |                       |
| No difficulty                                         |          | 26.00 (100.00%)                 | 24.00 (100.00%)                  | -                     |
| <b>Caring for body parts (d520), capacity (t2)</b>    | 50       |                                 |                                  |                       |
| No difficulty                                         |          | 26.00 (100.00%)                 | 24.00 (100.00%)                  | -                     |
| <b>Toileting (d530), performance (t1)</b>             | 50       |                                 |                                  | 0.480                 |
| No difficulty                                         |          | 26.00 (100.00%)                 | 23.00 (95.83%)                   |                       |
| Mild difficulty                                       |          | 0.00 (0.00%)                    | 1.00 (4.17%)                     |                       |
| <b>Toileting (d530), capacity (t1)</b>                | 50       |                                 |                                  | 0.480                 |

| <i>Characteristic</i>                     | <i>N</i> | <i>Location of the lesions</i>  |                                  | <i>p</i> <sup>2</sup> |
|-------------------------------------------|----------|---------------------------------|----------------------------------|-----------------------|
|                                           |          | <i>left, n = 26<sup>l</sup></i> | <i>right, n = 24<sup>l</sup></i> |                       |
| No difficulty                             |          | 26.00 (100.00%)                 | 23.00 (95.83%)                   |                       |
| Mild difficulty                           |          | 0.00 (0.00%)                    | 1.00 (4.17%)                     |                       |
| <b>Toileting (d530), performance (t2)</b> | 50       |                                 |                                  | 0.480                 |
| No difficulty                             |          | 26.00 (100.00%)                 | 23.00 (95.83%)                   |                       |
| Mild difficulty                           |          | 0.00 (0.00%)                    | 1.00 (4.17%)                     |                       |
| <b>Toileting (d530), capacity (t2)</b>    | 50       |                                 |                                  | 0.480                 |
| No difficulty                             |          | 26.00 (100.00%)                 | 23.00 (95.83%)                   |                       |
| Mild difficulty                           |          | 0.00 (0.00%)                    | 1.00 (4.17%)                     |                       |
| <b>Dressing (d540), performance (t1)</b>  | 50       |                                 |                                  | 1.00                  |
| No difficulty                             |          | 1.00 (3.85%)                    | 0.00 (0.00%)                     |                       |
| Mild difficulty                           |          | 20.00 (76.92%)                  | 20.00 (83.33%)                   |                       |
| Moderate difficulty                       |          | 5.00 (19.23%)                   | 4.00 (16.67%)                    |                       |
| <b>Dressing (d540), capacity (t1)</b>     | 50       |                                 |                                  | 1.00                  |
| No difficulty                             |          | 1.00 (3.85%)                    | 0.00 (0.00%)                     |                       |
| Mild difficulty                           |          | 20.00 (76.92%)                  | 20.00 (83.33%)                   |                       |
| Moderate difficulty                       |          | 5.00 (19.23%)                   | 4.00 (16.67%)                    |                       |
| <b>Dressing (d540), performance (t2)</b>  | 50       |                                 |                                  | 0.669                 |
| No difficulty                             |          | 22.00 (84.62%)                  | 22.00 (91.67%)                   |                       |
| Mild difficulty                           |          | 4.00 (15.38%)                   | 2.00 (8.33%)                     |                       |
| <b>Dressing (d540), capacity (t2)</b>     | 50       |                                 |                                  | 0.669                 |
| No difficulty                             |          | 22.00 (84.62%)                  | 22.00 (91.67%)                   |                       |
| Mild difficulty                           |          | 4.00 (15.38%)                   | 2.00 (8.33%)                     |                       |

| <i>Characteristic</i>                  | <i>N</i> | <i>Location of the lesions</i>  |                                  | <i>p</i> <sup>2</sup> |
|----------------------------------------|----------|---------------------------------|----------------------------------|-----------------------|
|                                        |          | <i>left, n = 26<sup>1</sup></i> | <i>right, n = 24<sup>1</sup></i> |                       |
| <b>Eating (d550), performance (t1)</b> | 50       |                                 |                                  | 1.00                  |
| No difficulty                          |          | 24.00 (92.31%)                  | 23.00 (95.83%)                   |                       |
| Mild difficulty                        |          | 1.00 (3.85%)                    | 1.00 (4.17%)                     |                       |
| Moderate difficulty                    |          | 1.00 (3.85%)                    | 0.00 (0.00%)                     |                       |
| <b>Eating (d550), capacity (t1)</b>    | 50       |                                 |                                  | 1.00                  |
| No difficulty                          |          | 24.00 (92.31%)                  | 23.00 (95.83%)                   |                       |
| Mild difficulty                        |          | 1.00 (3.85%)                    | 1.00 (4.17%)                     |                       |
| Moderate difficulty                    |          | 1.00 (3.85%)                    | 0.00 (0.00%)                     |                       |
| <b>Eating (d550), performance (t2)</b> | 50       |                                 |                                  | 1.00                  |
| No difficulty                          |          | 25.00 (96.15%)                  | 24.00 (100.00%)                  |                       |
| Mild difficulty                        |          | 1.00 (3.85%)                    | 0.00 (0.00%)                     |                       |
| <b>Eating (d550), performance (t2)</b> | 50       |                                 |                                  | 1.00                  |
| No difficulty                          |          | 25.00 (96.15%)                  | 24.00 (100.00%)                  |                       |
| Mild difficulty                        |          | 1.00 (3.85%)                    | 0.00 (0.00%)                     |                       |
| <sup>1</sup> <i>n</i> (%)              |          |                                 |                                  |                       |
| <sup>2</sup> Fisher's exact test       |          |                                 |                                  |                       |
